# Supplementary material for: Hierarchically porous CoNiO2nanosheet array films with superior sodium storage performance
Source: Royal Society of Chemistry journal article supplement (doi:10.1039/c7nj03241b), 2017-01-01
Supplement: c7nj03241b1.pdf [file c7nj03241b1.pdf]

## Supporting Information

### **Hierarchically porous CoNiO<sub>2</sub> nanosheet array films with superior sodium storage performance**

Ling Chang, Kai Wang, Liangai Huang, Zhishun He, Haibo Shao, Jianming Wang\*

Department of Chemistry, Zhejiang University, Hangzhou 310027, PR China

---

\*Corresponding author.

Tel.: +86-571-87951513; Fax: +86-571-87951895.

E-mail address: [wjm@zju.edu.cn](mailto:wjm@zju.edu.cn) (J.M. Wang)

## Supplementary Figure

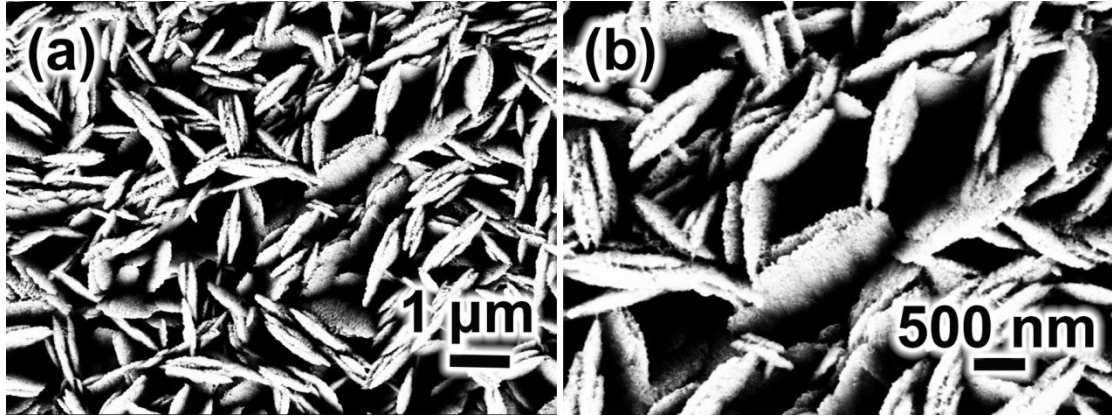

Figure S1 SEM images of precursor film.

## Supplementary Tables

Table S1 A rough sodium storage performance comparison of CoNiO<sub>2</sub> nanosheet array film material in this work and other anode materials in the recently reported references

| Material                                                                      | Rate                           | Cycle performance<br>Final capacity/cycle number |
|-------------------------------------------------------------------------------|--------------------------------|--------------------------------------------------|
| CoNiO <sub>2</sub> nanosheet array (this work)                                | 200 mA g <sup>-1</sup>         | 746.6 mAh g <sup>-1</sup> / 100                  |
| CoSe and porous carbon polyhedra (PCP) [1]                                    | 100 mA g <sup>-1</sup>         | 341 mAh g <sup>-1</sup> / 100                    |
| Core shell MoS <sub>2</sub> /C nanospheres [2]                                | 1000 mA g <sup>-1</sup>        | 337 mAh g <sup>-1</sup> / 300                    |
| Core-shell ultrathin NiO nanosheets/ hollow carbon microspheres composite [3] | 100 mA g <sup>-1</sup>         | 309 mAh g <sup>-1</sup> / 50                     |
| Bismuth nano spheres and porous carbon composite [4]                          | 200 mA g <sup>-1</sup>         | 106 mAh g <sup>-1</sup> / 1000                   |
| Expanded graphite [5]                                                         | 100 mA g <sup>-1</sup>         | 184 mAh g <sup>-1</sup> / 2000                   |
| MnFe <sub>2</sub> O <sub>4</sub> @C nanofibers [6]                            | 100 mA g <sup>-1</sup>         | 504 mAh g <sup>-1</sup> / 4200                   |
| Bowl-like hollow Co <sub>3</sub> O <sub>4</sub> [7]                           | 890 mA g <sup>-1</sup> / 1 C   | 290 mAh g <sup>-1</sup> / 10                     |
| W-Fe <sub>2</sub> O <sub>3</sub> [8]                                          | 100 mA g <sup>-1</sup> / 0.1 C | 129 mAh g <sup>-1</sup> / 100                    |
| E-Fe <sub>2</sub> O <sub>3</sub> [8]                                          | 40 mA g <sup>-1</sup> / 0.04 C | 82 mAh g <sup>-1</sup> / 60                      |
| Li <sub>4</sub> Ti <sub>5</sub> O <sub>12</sub> /C [9]                        | 35 mA g <sup>-1</sup> / 0.2 C  | 168 mAh g <sup>-1</sup> / 50                     |
| MoS <sub>2</sub> -PEO [10]                                                    | 50 mA g <sup>-1</sup> / 0.07 C | 148 mAh g <sup>-1</sup> / 70                     |

### References

[1] J.B. Li, D. Yan, T. Lu, Y.F. Yao, L.K. Pan, Chem. Eng. J. 325 (2017) 14-24.

[2] B.B. Wang, Y. Xia, G. Wang, Y.X. Zhou, H. Wang, Chem. Eng. J. 309 (2017) 417-425.

- [3] B.B. Wang, G. Wang, X.M. Cheng, H. Wang, Chem. Eng. J. 306 (2016) 1193-1202.
- [4] J.X. Qiu, S. Li, X.T. Su, Y.Z. Wang, L. Xu, S.Q. Yuan, H.M. Li, S.Q. Zhang, Chem. Eng. J. 320 (2017) 300-307.
- [5] Y. Wen, K. He, Y.J. Zhu, F.D. Han, Y.H. Xu, I. Matsuda, Y. Ishii, J. Cumings, C.S. Wang, Nat. Commun. 5 (2014) 4033.
- [6] Y.C. Liu, N. Zhang, C.M. Yu, L.F. Jiao, J. Chen, Nano Lett. 16 (2016) 3321-3328.
- [7] J.W. Wen, D.W. Zhang, Y. Zang, X. Sun, B. Cheng, C.X. Ding, Y. Yu, C.H. Chen, Electrochim. Acta 132 (2014) 193-199.
- [8] Z.G. Wu, Y.J. Zhong, J. Liu, J.H. Wu, X.D. Guo, B.H. Zhong, Z.Y. Zhang, J. Mater. Chem. A 3 (2015) 10092-10099.
- [9] K.T. Kim, C.Y. Yu, C.S. Yoon, S.J. Kim, Y.K. Sun, S.T. Myung, Nano Energy 12 (2015) 725-734.
- [10] Y.F. Li, Y.L. Liang, F.C.R. Hernandez, H.D. Yoo, Q.Y. An, Y. Yao, Nano Energy 15 (2015) 453-461.
